# Supplementary material
Source: PubMed Central journal article supplement (PMC4178620)
Supplement: AEM.01451-14_zam999105641so1.pdf [file AEM.01451-14_zam999105641so1.pdf]

## Supplemental Material

### Evaluating bias for Illumina-based bacterial 16S rRNA gene profiles

Katherine Kennedy<sup>1</sup>, Michael W. Hall<sup>1</sup>, Michael D. J. Lynch<sup>1</sup>, Gabriel Moreno-Hagelsieb<sup>2</sup>, and  
Josh D. Neufeld<sup>1</sup>#

<sup>1</sup>University of Waterloo, Department of Biology, 200 University Avenue West, Waterloo, ON,  
N2L 3G1, Canada

<sup>2</sup>Wilfrid Laurier University, Department of Biology, Waterloo, Ontario, Canada N2L 3C5,  
Canada

Running Head: Evaluating bias for 16S rRNA gene profiles

#Address correspondence to Josh D. Neufeld, [jneufeld@uwaterloo.ca](mailto:jneufeld@uwaterloo.ca)

**Keywords:** 16S rRNA genes, Illumina, bias, PCR, next-generation sequencing

Table S1. All samples sequenced with number of sequences contributed to analysis. Samples in light grey were excluded due to a low number of sequences and samples in dark grey were negative controls.

| Lane | Barcode | Sample | Pooled | Template Concentration | Barcode | Sequences Contributed |
|------|---------|--------|--------|------------------------|---------|-----------------------|
| 1    | V4_1R   | S1     | Yes    | high                   | ATCACG  | 29907                 |
| 1    | V4_2R   | S1     | Yes    | high                   | CGATGT  | 40939                 |
| 1    | V4_3R   | S1     | Yes    | high                   | TTAGGC  | 40012                 |
| 1    | V4_4R   | S1     | Yes    | high                   | TGACCA  | 24218                 |
| 1    | V4_5R   | S1     | Yes    | high                   | ACAGTG  | 43532                 |
| 1    | V4_6R   | S1     | Yes    | low                    | GCCAAT  | 16085                 |
| 1    | V4_7R   | S1     | Yes    | low                    | CAGATC  | 222                   |
| 1    | V4_8R   | S1     | Yes    | low                    | ACTTGA  | 15911                 |
| 1    | V4_9R   | S1     | Yes    | low                    | GATCAG  | 36273                 |
| 1    | V4_10R  | S1     | Yes    | low                    | TAGCTT  | 15054                 |
| 1    | V4_11R  | 6TD    | Yes    | high                   | GGCTAC  | 41985                 |
| 1    | V4_12R  | 6TD    | Yes    | high                   | CTTGTA  | 77059                 |
| 1    | V4_13R  | 6TD    | Yes    | high                   | AGTACG  | 70548                 |
| 1    | V4_14R  | 6TD    | Yes    | high                   | TCAGTC  | 50318                 |
| 1    | V4_15R  | 6TD    | Yes    | high                   | TTGAGC  | 97766                 |
| 1    | V4_16R  | 6TD    | Yes    | low                    | AAGCGA  | 15909                 |
| 1    | V4_17R  | 6TD    | Yes    | low                    | TCCTCA  | 15161                 |
| 1    | V4_18R  | 6TD    | Yes    | low                    | GGTTGT  | 12052                 |
| 1    | V4_19R  | 6TD    | Yes    | low                    | TGAGGT  | 23508                 |
| 1    | V4_20R  | 6TD    | Yes    | low                    | TACCGT  | 24562                 |
| 1    | V4_21R  | 10AS   | Yes    | high                   | CCAACT  | 71393                 |
| 1    | V4_22R  | 10AS   | Yes    | high                   | AGAGAG  | 42154                 |
| 1    | V4_23R  | 10AS   | Yes    | high                   | CACTTG  | 69607                 |
| 1    | V4_24R  | 10AS   | Yes    | high                   | TCAAGG  | 63817                 |
| 1    | V4_25R  | 10AS   | Yes    | high                   | AGTGGT  | 54384                 |
| 1    | V4_26R  | 10AS   | Yes    | low                    | GACACT  | 13211                 |
| 1    | V4_27R  | 10AS   | Yes    | low                    | CCTTCT  | 27644                 |
| 1    | V4_28R  | 10AS   | Yes    | low                    | GGATAA  | 20895                 |
| 1    | V4_29R  | 10AS   | Yes    | low                    | CCTTAA  | 14797                 |
| 1    | V4_30R  | 10AS   | Yes    | low                    | CAAGAA  | 12505                 |
| 1    | V4_31R  | S3     | Yes    | high                   | GTTGAA  | 58081                 |
| 1    | V4_32R  | S3     | Yes    | high                   | TCACAA  | 58995                 |
| 1    | V4_33R  | S3     | Yes    | high                   | AGTCAA  | 54104                 |
| 1    | V4_34R  | S3     | Yes    | high                   | CGAATA  | 70280                 |
| 1    | V4_35R  | S3     | Yes    | high                   | GCTATA  | 60227                 |
| 1    | V4_36R  | S3     | Yes    | low                    | GAGTTA  | 17204                 |
| 1    | V4_37R  | S3     | Yes    | low                    | TTGGTA  | 17907                 |
| 1    | V4_38R  | S3     | Yes    | low                    | AACGTA  | 29850                 |
| 1    | V4_39R  | S3     | Yes    | low                    | GTAATA  | 16578                 |

|   |        |      |     |      |        |        |
|---|--------|------|-----|------|--------|--------|
| 1 | V4_40R | S3   | Yes | low  | CATCTA | 257    |
| 1 | V4_41R | S1   | No  | high | TGTAGA | 56188  |
| 1 | V4_42R | S1   | No  | high | ATCAGA | 48967  |
| 1 | V4_43R | S1   | No  | high | ACATGA | 44309  |
| 1 | V4_44R | S1   | No  | high | TAGACA | 42964  |
| 1 | V4_45R | S1   | No  | high | GAGAAT | 3699   |
| 1 | V4_46R | S1   | No  | low  | CTCAAT | 2279   |
| 1 | V4_47R | S1   | No  | low  | AGGTAT | 9222   |
| 1 | V4_48R | S1   | No  | low  | TTGCAT | 1835   |
| 1 | V4_49R | S1   | No  | low  | TGGATT | 36714  |
| 1 | V4_50R | S1   | No  | low  | ACCATT | 5904   |
| 1 | V4_51R | 6TD  | No  | high | CTAGTT | 39474  |
| 1 | V4_52R | 6TD  | No  | high | AGTGTT | 277    |
| 1 | V4_53R | 6TD  | No  | high | TCTCTT | 46185  |
| 1 | V4_54R | 6TD  | No  | high | GTAAGT | 137519 |
| 1 | V4_55R | 6TD  | No  | high | CAATGT | 34483  |
| 1 | V4_56R | 6TD  | No  | low  | ATTCGT | 26978  |
| 1 | V4_57R | 6TD  | No  | low  | ATGACT | 14975  |
| 1 | V4_58R | 6TD  | No  | low  | ACTTCT | 43590  |
| 1 | V4_59R | 6TD  | No  | low  | CATAAG | 4315   |
| 1 | V4_60R | 6TD  | No  | low  | TTCTAG | 20219  |
| 1 | V4_61R | 10AS | No  | high | AAGATG | 73682  |
| 1 | V4_62R | 10AS | No  | high | TATGTG | 52649  |
| 1 | V4_63R | 10AS | No  | high | AATTGG | 27085  |
| 1 | V4_64R | 10AS | No  | high | TAATCG | 507    |
| 1 | V4_65R | 10AS | No  | high | ACTAAC | 80471  |
| 1 | V4_66R | 10AS | No  | low  | TGTTAC | 4272   |
| 1 | V4_67R | 10AS | No  | low  | ATACAC | 32074  |
| 1 | V4_68R | 10AS | No  | low  | CTTATC | 45677  |
| 1 | V4_69R | 10AS | No  | low  | AGATTC | 3006   |
| 1 | V4_70R | 10AS | No  | low  | ACGGAA | 30973  |
| 1 | V4_71R | S3   | No  | high | TGCGAA | 147    |
| 1 | V4_72R | S3   | No  | high | GACCAA | 49796  |
| 1 | V4_73R | S3   | No  | high | CTGTCA | 27838  |
| 1 | V4_74R | S3   | No  | high | GCAGAT | 27438  |
| 1 | V4_75R | S3   | No  | high | TCGTGT | 42015  |
| 1 | V4_76R | S3   | No  | low  | GAACCT | 26648  |
| 1 | V4_77R | S3   | No  | low  | GTCATG | 85676  |
| 1 | V4_78R | S3   | No  | low  | GATAGC | 4595   |
| 1 | V4_79R | S3   | No  | low  | AAGTCC | 31185  |
| 1 | V4_80R | S3   | No  | low  | ATTGCC | 6566   |
| 1 | V4_81R | SX   | yes | high | CCGAGA | 53661  |
| 1 | V4_82R | SX   | yes | high | CGCTGA | 143162 |
| 1 | V4_83R | SX   | yes | high | GGCACA | 52548  |
| 1 | V4_84R | SX   | yes | low  | CGTGCA | 27642  |

|   |        |         |     |      |        |       |
|---|--------|---------|-----|------|--------|-------|
| 1 | V4_85R | SX      | yes | low  | GGCCTT | 27417 |
| 1 | V4_86R | SX      | yes | low  | CCTGGT | 20185 |
| 1 | V4_87R | SX      | yes | high | CAGGCT | 41885 |
| 1 | V4_88R | SX      | yes | high | GTCGCT | 53682 |
| 1 | V4_89R | SX      | yes | high | GCGTAG | 35433 |
| 1 | V4_90R | SX      | yes | low  | CTGGAG | 37627 |
| 1 | V4_91R | SX      | yes | low  | CTACGG | 35151 |
| 1 | V4_92R | SX      | yes | low  | ACACCG | 29416 |
| 1 | V4_93R | negcont | na  | na   | GTTCCG | 241   |
| 1 | V4_94R | negcont | na  | na   | CAGCAC | 642   |
| 1 | V4_95R | negcont | na  | na   | CCGTTC | 464   |
| 1 | V4_96R | negcont | na  | na   | GCATCC | 371   |
| 2 | V4_1R  | S1      | Yes | high | ATCACG | 23312 |
| 2 | V4_2R  | S1      | Yes | high | CGATGT | 30580 |
| 2 | V4_3R  | S1      | Yes | high | TTAGGC | 0     |
| 2 | V4_4R  | S1      | Yes | high | TGACCA | 28383 |
| 2 | V4_5R  | S1      | Yes | high | ACAGTG | 31086 |
| 2 | V4_6R  | S1      | Yes | low  | GCCAAT | 19715 |
| 2 | V4_7R  | S1      | Yes | low  | CAGATC | 24126 |
| 2 | V4_8R  | S1      | Yes | low  | ACTTGA | 19623 |
| 2 | V4_9R  | S1      | Yes | low  | GATCAG | 20025 |
| 2 | V4_10R | S1      | Yes | low  | TAGCTT | 16685 |
| 2 | V4_11R | 6TD     | Yes | high | GGCTAC | 31789 |
| 2 | V4_12R | 6TD     | Yes | high | CTTGTA | 37765 |
| 2 | V4_13R | 6TD     | Yes | high | AGTACG | 41893 |
| 2 | V4_14R | 6TD     | Yes | high | TCAGTC | 34343 |
| 2 | V4_15R | 6TD     | Yes | high | TTGAGC | 46193 |
| 2 | V4_16R | 6TD     | Yes | low  | AAGCGA | 13917 |
| 2 | V4_17R | 6TD     | Yes | low  | TCCTCA | 18927 |
| 2 | V4_18R | 6TD     | Yes | low  | GGTTGT | 8183  |
| 2 | V4_19R | 6TD     | Yes | low  | TGAGGT | 16947 |
| 2 | V4_20R | 6TD     | Yes | low  | TACCGT | 9733  |
| 2 | V4_21R | 10AS    | Yes | high | CCAACT | 44346 |
| 2 | V4_22R | 10AS    | Yes | high | AGAGAG | 36900 |
| 2 | V4_23R | 10AS    | Yes | high | CACTTG | 44436 |
| 2 | V4_24R | 10AS    | Yes | high | TCAAGG | 43535 |
| 2 | V4_25R | 10AS    | Yes | high | AGTGGT | 50034 |
| 2 | V4_26R | 10AS    | Yes | low  | GACACT | 14967 |
| 2 | V4_27R | 10AS    | Yes | low  | CCTTCT | 15885 |
| 2 | V4_28R | 10AS    | Yes | low  | GGATAA | 22784 |
| 2 | V4_29R | 10AS    | Yes | low  | CCTTAA | 14842 |
| 2 | V4_30R | 10AS    | Yes | low  | CAAGAA | 10201 |
| 2 | V4_31R | S3      | Yes | high | GTTGAA | 42576 |
| 2 | V4_32R | S3      | Yes | high | TCACAA | 38499 |
| 2 | V4_33R | S3      | Yes | high | AGTCAA | 43807 |

|   |        |      |     |      |        |       |
|---|--------|------|-----|------|--------|-------|
| 2 | V4_34R | S3   | Yes | high | CGAATA | 51703 |
| 2 | V4_35R | S3   | Yes | high | GCTATA | 57034 |
| 2 | V4_36R | S3   | Yes | low  | GAGTTA | 16813 |
| 2 | V4_37R | S3   | Yes | low  | TTGGTA | 20506 |
| 2 | V4_38R | S3   | Yes | low  | AACGTA | 20498 |
| 2 | V4_39R | S3   | Yes | low  | GTAATA | 12793 |
| 2 | V4_40R | S3   | Yes | low  | CATCTA | 458   |
| 2 | V4_41R | S1   | No  | high | TGTAGA | 33518 |
| 2 | V4_42R | S1   | No  | high | ATCAGA | 30673 |
| 2 | V4_43R | S1   | No  | high | ACATGA | 16622 |
| 2 | V4_44R | S1   | No  | high | TAGACA | 26813 |
| 2 | V4_45R | S1   | No  | high | GAGAAT | 23804 |
| 2 | V4_46R | S1   | No  | low  | CTCAAT | 4158  |
| 2 | V4_47R | S1   | No  | low  | AGGTAT | 8406  |
| 2 | V4_48R | S1   | No  | low  | TTGCAT | 21612 |
| 2 | V4_49R | S1   | No  | low  | TGGATT | 29469 |
| 2 | V4_50R | S1   | No  | low  | ACCATT | 25817 |
| 2 | V4_51R | 6TD  | No  | high | CTAGTT | 29569 |
| 2 | V4_52R | 6TD  | No  | high | AGTGTT | 22184 |
| 2 | V4_53R | 6TD  | No  | high | TCTCTT | 23581 |
| 2 | V4_54R | 6TD  | No  | high | GTAAGT | 57618 |
| 2 | V4_55R | 6TD  | No  | high | CAATGT | 24669 |
| 2 | V4_56R | 6TD  | No  | low  | ATTCGT | 14641 |
| 2 | V4_57R | 6TD  | No  | low  | ATGACT | 18141 |
| 2 | V4_58R | 6TD  | No  | low  | ACTTCT | 30553 |
| 2 | V4_59R | 6TD  | No  | low  | CATAAG | 16383 |
| 2 | V4_60R | 6TD  | No  | low  | TTCTAG | 15738 |
| 2 | V4_61R | 10AS | No  | high | AAGATG | 35874 |
| 2 | V4_62R | 10AS | No  | high | TATGTG | 32479 |
| 2 | V4_63R | 10AS | No  | high | AATTGG | 22976 |
| 2 | V4_64R | 10AS | No  | high | TAATCG | 11814 |
| 2 | V4_65R | 10AS | No  | high | ACTAAC | 46183 |
| 2 | V4_66R | 10AS | No  | low  | TGTTAC | 15111 |
| 2 | V4_67R | 10AS | No  | low  | ATACAC | 16895 |
| 2 | V4_68R | 10AS | No  | low  | CTTATC | 19676 |
| 2 | V4_69R | 10AS | No  | low  | AGATTC | 13698 |
| 2 | V4_70R | 10AS | No  | low  | ACGGAA | 15970 |
| 2 | V4_71R | S3   | No  | high | TGCGAA | 23264 |
| 2 | V4_72R | S3   | No  | high | GACCAA | 33802 |
| 2 | V4_73R | S3   | No  | high | CTGTCA | 27377 |
| 2 | V4_74R | S3   | No  | high | GCAGAT | 30528 |
| 2 | V4_75R | S3   | No  | high | TCGTGT | 20118 |
| 2 | V4_76R | S3   | No  | low  | GAACCT | 28758 |
| 2 | V4_77R | S3   | No  | low  | GTCATG | 55074 |
| 2 | V4_78R | S3   | No  | low  | GATAGC | 14274 |

|   |        |          |     |      |        |       |
|---|--------|----------|-----|------|--------|-------|
| 2 | V4_79R | S3       | No  | low  | AAGTCC | 16168 |
| 2 | V4_80R | S3       | No  | low  | ATTGCC | 15946 |
| 2 | V4_81R | SX       | yes | high | CCGAGA | 44568 |
| 2 | V4_82R | SX       | yes | high | CGCTGA | 41293 |
| 2 | V4_83R | SX       | yes | high | GGCACA | 35443 |
| 2 | V4_84R | SX       | yes | low  | CGTGCA | 16991 |
| 2 | V4_85R | SX       | yes | low  | GGCCTT | 16868 |
| 2 | V4_86R | SX       | yes | low  | CCTGGT | 12231 |
| 2 | V4_87R | SX       | yes | high | CAGGCT | 32029 |
| 2 | V4_88R | SX       | yes | high | GTCGCT | 35515 |
| 2 | V4_89R | SX       | yes | high | GCGTAG | 25929 |
| 2 | V4_90R | SX       | yes | low  | CTGGAG | 24184 |
| 2 | V4_91R | SX       | yes | low  | CTACGG | 21652 |
| 2 | V4_92R | SX       | yes | low  | ACACCG | 19598 |
| 2 | V4_93R | -ve ctrl | n/a | n/a  | GTTCCG | 248   |
| 2 | V4_94R | -ve ctrl | n/a | n/a  | CAGCAC | 866   |
| 2 | V4_95R | -ve ctrl | n/a | n/a  | CCGTTC | 429   |
| 2 | V4_96R | -ve ctrl | n/a | n/a  | GCATCC | 610   |

Table S2. Analysis of variance between replicates of each group. The  $F$ -ratio ( $F$ ) represents the group variance divided by the unexplained within-group variance;  $p$  represents the probability that the observed ratio would be expected based on chance alone.

| Sample | Template concentration         | Pooling                   | Lane                       |
|--------|--------------------------------|---------------------------|----------------------------|
| 6TD    | $F = 139.6$<br>$p = 6.0^{-14}$ | $F = 1.77$<br>$p = 0.19$  | $F = 0.197$<br>$p = 0.66$  |
| 10AS   | $F = 188.2$<br>$p = 7.2^{-16}$ | $F = 3.31$<br>$p = 0.077$ | $F = 0.0214$<br>$p = 0.88$ |
| S1     | $F = 11.2$<br>$p = 0.0021$     | $F = 1.22$<br>$p = 0.28$  | $F = 3.16$<br>$p = 0.085$  |
| S3     | $F = 3.74$<br>$p = 0.061$      | $F = 0.944$<br>$p = 0.34$ | $F = 0.275$<br>$p = 0.60$  |
| SX     | $F = 17.8$<br>$p = 0.00035$    | $F = 0.169$<br>$p = 0.69$ | $F = 1.82$<br>$p = 0.19$   |
